# Supplementary material
Source: PubMed Central journal article supplement (PMC1347976)

**A**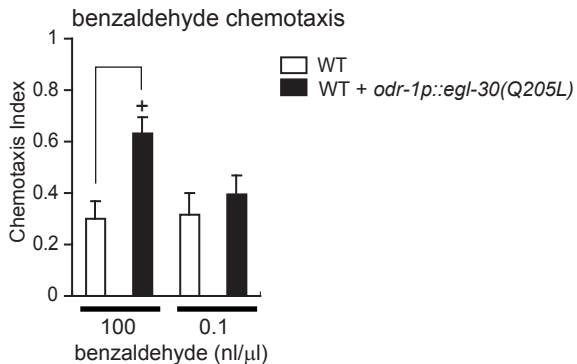**B**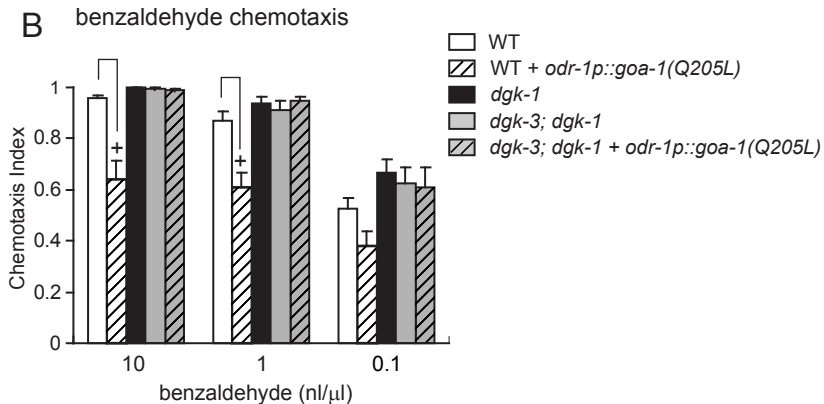

Supplement: pnas_0506954103_1.pdf [file pnas_0506954103_1.pdf]

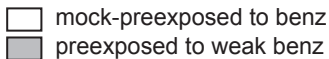

### benz adaptation

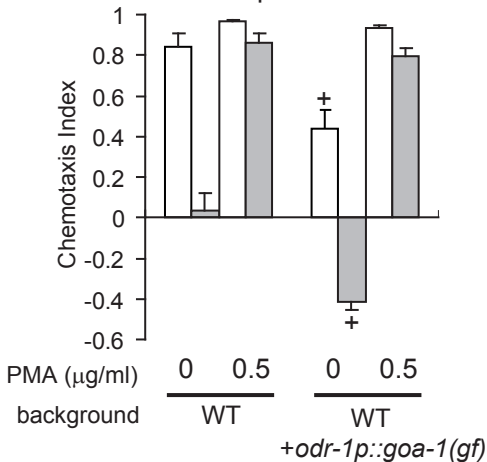

Supplement: pnas_0506954103_2.pdf [file pnas_0506954103_2.pdf]
